1 **Title: Chloroplast-localized translation for protein targeting in *Chlamydomonas reinhardtii***

2 **Authors:** Yi Sun<sup>1,2‡</sup>, Shiva Bakhtiari<sup>1‡</sup>, Melissa Valente-Paterno<sup>1,3</sup>, Yanxia Wu<sup>1</sup>, Christopher  
3 Law<sup>3</sup>, Daniel Dai<sup>4</sup>, James Dhaliwal<sup>1</sup>, Khanh Huy Bui<sup>4</sup>, and William Zerges<sup>1\*</sup>

4 **Affiliations:**

5 <sup>1</sup>Department of Biology, Concordia University, 7141 Sherbrooke W, Montreal, Quebec, H4B  
6 1R6, Canada.

7 <sup>2</sup>current address: Dept. of Plant Sciences, University of Oxford, South Parks Road, Oxford  
8 OX1 3RB, United Kingdom.

9 <sup>3</sup>Centre for Microscopy and Cell Imaging, Concordia University, 7141 Sherbrooke W.,  
10 Montreal, Quebec, H4B 1R6, Canada

11 <sup>4</sup>Department of Anatomy and Cell Biology, McGill University, 3640 University, Montreal,  
12 Quebec, H3A0C7, Canada.

13 ‡ These authors contributed equally to this work.

14 \* Corresponding author. Email: [william.zerges@concordia.ca](mailto:william.zerges@concordia.ca)

15 **Abstract:** Translation is localized within cells to target proteins to their proper locations. We asked  
16 whether translation occurs on the chloroplast surface in *Chlamydomonas* and, if so, whether it is  
17 involved in co-translational protein targeting, aligned spatially with localized translation by the  
18 bacterial-type ribosomes within this organelle, or both. Our results reveal a domain of the  
19 chloroplast envelope which is bound by translating ribosomes. Purified chloroplasts retained  
20 ribosomes and mRNAs encoding two chloroplast proteins specifically on this “translation  
21 domain”, but not a mRNA encoding a cytoplasmic protein. Ribosomes clusters were seen on this  
22 domain by electron tomography. Activity of the chloroplast-bound ribosomes is supported by  
23 results of the ribopuromycylation and puromycin-release assays. Co-translational chloroplast  
24 protein import is supported by nascent polypeptide dependency of the ribosome-chloroplast  
25 associations. This cytoplasmic translation domain aligns localized translation by organellar  
26 bacterial-type ribosomes in the chloroplast. This juxtaposition the dual translation systems  
27 facilitates the targeting and assembly of the polypeptide products.

28

29 **One-Sentence Summary:** Translation is localized to a domain of the chloroplast envelope for  
30 co-translational protein targeting in *Chlamydomonas*.

31

## 32 **Introduction**

33 Translation is localized in cells to ensure that the protein products get to the proper compartment,  
34 are integrated into membranes or assembled into complexes (1). Cytoplasmic ribosomes (cyto-  
35 ribosomes) on the ER synthesize polypeptides undergoing either co-translational import or  
36 insertion into the ER membrane. Mitochondria in yeast and human cells are bound by cyto-  
37 ribosomes which synthesize mitochondrial proteins, of which many undergo co-translational  
38 import (2, 3). Mitochondria and chloroplasts contain bacteria-type ribosomes, “mito-ribosomes”  
39 and “chloro-ribosomes”, respectively, for the synthesis of proteins encoded by the small genomes  
40 in these semiautonomous organelles (4). Chloroplast proteins that are encoded by nuclear genes  
41 are widely believed to be synthesized at random cytoplasmic locations and undergo  
42 posttranslational import (4, 5). This is based on the ability of purified chloroplasts to import *in*  
43 *vitro* synthesized chloroplast pre-proteins (i.e. still having their N-terminal localization sequence)  
44 and EM images of chloroplasts lacking the arrays of bound cyto-ribosomes seen on the rough ER  
45 and mitochondria (4). Some of the bacterial-type ribosomes within chloroplasts translate on  
46 thylakoid membranes as their nascent polypeptides undergo co-translational import (6). While  
47 translation on the cytoplasmic surface of a chloroplast has not been demonstrated, this possibility  
48 was raised by images from TEM and fluorescence microscopy of the unicellular green alga  
49 *Chlamydomonas reinhardtii* showing that chloroplast is adjacent to cytoplasmic region enriched  
50 in cyto-ribosomes and the mRNA encoding a chloroplast-localized protein (7, 8). .

51 Here, we show that cyto-ribosomes translated on a “translation domain” of the chloroplast  
52 envelope in *Chlamydomonas*. These associations are demonstrated by 1) the retention of cyto-  
53 ribosomes by chloroplasts during their purification from free cyto-ribosomes and organelles  
54 known to bind them, 2) immunofluorescence (IF) microscopy images of a marker cyto-ribosomal

55 protein (cyL4) on the chloroplast surface and 3) high resolution electron tomography images  
56 showing ribosome clusters on the outer envelope membrane. Translational activity of these  
57 chloroplast-bound cyto-ribosomes is demonstrated by results of the ribopuromylation (RPM)  
58 and the puromycin-release assays (9–12). A proportion of these chloroplast-bound cyto-ribosomes  
59 were tethered by their nascent polypeptides, evidence that their nascent polypeptides were  
60 undergoing co-translational import *in vivo*. Synthesis of chloroplast-localized light-harvesting  
61 proteins and the small subunit of Rubisco (RBCS1 and RBCS2) on the translation domain of the  
62 chloroplast envelope is supported by results of fluorescence *in situ* hybridization (FISH) showing  
63 that purified chloroplast retained mRNAs encoding chloroplast-localized light-harvesting complex  
64 proteins (LHCPs) and the small subunits of ribulose bis-phosphate carboxylase-oxygenase  
65 (Rubisco) RBCS1 and RBCS2, but not the mRNA encoding the cytoplasmic protein  $\beta$ 2-tubulin.  
66 Finally, the translation domain of the envelope is spatially aligned with domains of the envelope  
67 enriched in the protein translocons of the inner/outer membrane of the chloroplast envelope (TIC  
68 and TOC) and the translation zone (T-zone), an intraorganellar compartment where chloro-  
69 ribosomes translate subunits of photosystem I (PSI) and photosystem II (PSII) of the  
70 photosynthetic electron transport chain (8, 13–15) (Fig. 1A). Therefore, our results reveal evidence  
71 of an elaborate spatial coordination of translation of the dual translation system for photosystem  
72 biogenesis.

73

## 74 **RESULTS**

### 75 **Cyto-ribosomes are bound to a translation domain of the chloroplast envelope.**

76 To explore the possibility that translation is localized to the outer envelope membrane of  
77 the chloroplast in *Chlamydomonas*, we asked whether cyto-ribosomes copurify with chloroplasts

78 during their isolation from away from cyto-ribosomes that are free or bound to contaminating ER  
79 and mitochondria. Isolated chloroplast retained more cyto-ribosomes than can likely be explained  
80 by contamination by mitochondria and ER (Fig. 1B). To determine whether cyto-ribosomes were  
81 bound to the purified chloroplasts, we imaged the ribosomal protein cyL4 by IF microscopy. On  
82 purified chloroplasts, the cyL4 IF signal was seen adjacent to the chloroplast envelope, which was  
83 co-IF-stained for the envelope marker protein LCIA (*16*). The cyL4 signal was strongest at a region  
84 of the chloroplast envelope bordering the central nuclear-cytosolic region (Fig. 1A and C). This  
85 localization pattern can be seen in a representative chloroplast and in the average signal distribution  
86 in all chloroplasts of the data set, but not in images of whole cells, where the signal was throughout  
87 the cytoplasm (Fig. 1C and D, Fig. S1A). This chloroplast-localized cyL4 IF signal was not from  
88 cyto-ribosomes bound to ER or mitochondria that were retained by these chloroplasts because  
89 marker proteins for these organelles did not show the same pattern as cyL4 (Figs 1D, S2A and B).  
90 These results support associations of cyto-ribosomes with a translation domain of the chloroplast  
91 envelope which spatially aligns with the T-zone within this organelle (Fig. 1A).

92 **Cyto-ribosomes on the translation domain of the chloroplast envelope were imaged by high-**  
93 **resolution electron tomography.**

94 The evidence cited against chloroplast-localized translation includes EM images of  
95 chloroplast envelope devoid of bound ribosomes and chloroplasts surrounded by a cyto-ribosome-  
96 free zone (*17–19*). Therefore, to determine whether cyto-ribosomes can be visualized on the  
97 chloroplast envelope, and to validate the cyL4 IF signal as a marker for them, we imaged cells  
98 with three-dimensional high-resolution electron tomography (Fig. 2). For reference, we imaged  
99 the envelope of chloroplast lobes, which did not strongly IF-stain for cyL4. The results show the  
100 presence of cyto-ribosome clusters on the chloroplast envelope domain where we observed the

101 localized cyL4 IF signal (Compare Figs. 1C and 2C-F). Cyto-ribosome density was lower on other  
102 regions of the chloroplast envelope, e.g., of the chloroplast lobe (Fig. 2F and G). This illustrates  
103 that, cyto-ribosomes are on the chloroplast envelope, thereby, corroborating the results of IF  
104 microscopy.

### 105 **Chloroplast-bound cyto-ribosomes are active.**

106 We used two methods to determine whether the chloroplast-bound cyto-ribosomes are  
107 translationally active. The RPM method takes advantage of the conjugation of puromycin to the  
108 nascent polypeptide when it terminates translation by imaging the IF signal from the resulting  
109 puromycin-conjugated nascent polypeptides as markers *in situ* for locations of translation *in vivo*  
110 (12). Routing of the puromycin-conjugated nascent polypeptides from sites of their synthesis, a  
111 concern when live cells are treated prior to fixation and IF-staining (20), is unlikely because we  
112 treated isolated chloroplasts with puromycin.

113 Chloroplasts were isolated, treated with puromycin, IF-stained with an antibody specific to  
114 puromycin, and imaged by epifluorescence microscopy. (Specificity of the puromycin signal is  
115 demonstrated in Fig S2C). Isolated chloroplasts showed the strongest IF-signal of puromycin-  
116 conjugated nascent polypeptides at the envelope domain marked by the localized cyL4 IF-signal  
117 (Fig. 3A). Localization of the puromycin signal on the cytoplasmic side of the chloroplast envelope  
118 (LCIA) demonstrates that these nascent polypeptides were from cyto-ribosomes and not chloro-  
119 ribosomes (Fig. 3B). Moreover, this puromycin-nascent polypeptide localization pattern was seen  
120 in the average signal distribution in maximal intensity projection of all chloroplasts in the data set  
121 (Fig. 3C). These results support translational activity of the chloroplast-bound cyto-ribosomes *in*  
122 *vivo*.

123           The puromycin-release assay tests for organelle-localized translation by exploiting the  
124 specificity of puromycin for releasing translating ribosomes from their nascent polypeptides (9).  
125 Puromycin-induced release of cyto-ribosome from an isolated organelle is evidence that the  
126 ribosomes were translating and tethered by nascent polypeptides undergoing co-translational  
127 passage via the protein translocons in the organellar membrane (9, 21). In addition, ribosomes on  
128 the ER, mitochondria and thylakoid membranes required high-ionic strength (300-750 mM KCl)  
129 to be released, because they are bound to ribosome receptors on the organelle surface (10, 22, 23).  
130 When chloroplasts were incubated in the high ionic strength condition (750 mM KCl), a significant  
131 proportion of cyL4 was released (32%,  $p=0.037$ ) (Fig. 3D). Therefore, this proportion of the cyto-  
132 ribosomes on the translation domain of the chloroplast envelope were bound by non-covalent  
133 bonds alone. Treatments with both puromycin and high ionic strength released 49% of cyL4 ( $p=$   
134  $0.012$ ), 17% more than were released during treatment with high ionic strength alone ( $p=0.023$ ).  
135 Therefore, these cyto-ribosomes were bound by both non-covalent bonds and their nascent  
136 polypeptides. This result confirms that some of the chloroplast-bound cyto-ribosomes were  
137 translationally active *in vivo*. It also reveals that at 17% of the ribosomes were associated by their  
138 nascent polypeptides. Similar results revealed previously that nascent polypeptides undergo co-  
139 translational import into the ER and mitochondria (10, 22, 23). Moreover, the retention of the  
140 puromycin-conjugated nascent polypeptides by the chloroplast envelope domain is consistent with  
141 their being anchored in the chloroplast envelope, for example, possibly reflecting co-translational  
142 import. (Fig. 3A-C). Finally, puromycin alone did not release a significant proportion of cyL4  
143 ( $p=0.603$ ), revealing that few, if any, cyto-ribosomes were associated with the chloroplast by  
144 nascent polypeptides alone. That approximately 50% of the cyto-ribosomes were not dissociated  
145 by any of the treatments could reflect high affinity ribosome-chloroplast associations, ribosomes

146 trapped within contaminating unbroken cells or both. Together, these results reveal the chloroplast  
147 bound cyto-ribosomes are active and bound to the chloroplast by both non-covalent bonds and  
148 their nascent polypeptides.

149 **The translation domain of the chloroplast envelope is bound by mRNAs encoding**  
150 **chloroplast-localized LHCB and RBCS proteins.**

151 The results above support localized translation by chloroplast-bound cyto-ribosomes for  
152 protein import into the T-zone within the chloroplast (Fig. 1A). This predicts that the translation  
153 domain of the chloroplast envelope is associated with mRNAs encoding chloroplast proteins, but  
154 not mRNAs encoding non-chloroplast proteins. We used FISH to test this prediction (24). The  
155 imported chloroplast proteins include subunits of the light harvesting complexes (LHCs), which  
156 each have three hydrophobic transmembrane domains and are embedded in the membranes of  
157 photosynthetic thylakoid vesicles where they associate with PSI and PSII (25, 26). One might  
158 expect LHCPs to be synthesized by chloroplast-bound cyto-ribosomes and undergo co-  
159 translational import and membrane insertion because the vast majority of such hydrophobic  
160 integral membrane proteins use this targeting mechanism to prevent their misfolding and  
161 aggregation in the aqueous cytoplasm and, consequentially, impaired import and toxicity (2, 3,  
162 27). Therefore, we asked whether chloroplasts released from cells retain mRNAs encoding LHCPs  
163 (28). Our FISH probe sequences are complementary to the mRNAs of *LHCBM2* (Cre12.g548400)  
164 and *LHCBM7* (Cre12.g548950), highly similar paralogues in the *LHCB* gene family (Table S1).  
165 The mRNAs detected by these probes are referred to collectively as “*LHCBM*” here. In cells, the  
166 *LHCBM* FISH signal was detected from the cytosol, where it was enriched near the chloroplast, as  
167 was reported previously (Fig. 4E and Fig S1B) (8). Chloroplasts retained 96% of average cellular  
168 signal, and individual chloroplasts showed localized signal closely adjacent to, but not



169 overlapping, the chloroplast-localized cyL4 IF signal (Fig. 4A and B). Consistency of this  
170 localization pattern across all chloroplasts imaged was seen in a display of the average *LHCBM*  
171 mRNA FISH signal distribution (Fig. 4E). While the translation domain extends along the  
172 envelope between opposing lobes, the strongest average *LHCBM* mRNA FISH signal was  
173 localized at the center of this domain (contrast cyL4 in Fig. 1D versus *LHCBM* and *RBCS* in Fig.  
174 4E, illustrated in Fig. 1A). These results reveal a physical association of *LHCBM* mRNAs with the  
175 translation domain of the chloroplast envelope. We also imaged the mRNAs of *RBCS1* and *RBCS2*,  
176 which encode the small subunits of Rubisco, a chloroplast-localized enzyme (Cre02.g120100 and  
177 Cre02.g120150). We refer to these mRNAs as “*RBCS*” because our FISH probes hybridize to both  
178 (Table S1). In cells, localization of the *RBCS* mRNAs in the cytosol was not evident in most  
179 images, as was reported previously (Fig. S1C) (8). However, the average *RBCS* FISH signal from  
180 all cells imaged revealed localization to the approximate location of the cyto-ribosomes on the  
181 translation domain of the chloroplast envelope (Fig. 4E). Moreover, an association of the *RBCS*  
182 mRNAs with the chloroplast was revealed by our findings that free chloroplasts retained 80% of  
183 the cellular *RBCS* FISH signal and that individual chloroplasts showed this signal localized at the  
184 middle of the translation domain (marked by cyL4), like the localization of the *LHCBM* mRNA  
185 FISH signal (Fig. 4A and C). A heatmap of the average *RBCS* FISH signal confirmed this  
186 localization pattern and revealed that more of the *RBCS* mRNA FISH signal was around the entire  
187 basal (posterior) region of the chloroplast, than was the *LHCBM* FISH signal (Fig. 4E). These  
188 results support the translation of at least a few cytoplasmic mRNAs encoding chloroplast proteins  
189 by the cyto-ribosomes in the center of the translation domain of the chloroplast envelope.

190 To assess for specificity of chloroplast localization of mRNAs encoding chloroplast  
191 proteins, we visualized the FISH signal from the *TUB2* mRNA, which encodes  $\beta$ 2-tubulin, a

192 protein of the cytoplasm and cilia (Cre12.g549550) (29). In cells, strong *TUB2* FISH signal was  
193 detected throughout the cytosol, as reported previously (Fig. 4E, Fig. S1D) (7). Chloroplasts  
194 retained 2% of this signal (Fig. 4A) which was not enriched at or near the translation domain (Fig.  
195 4D and E). These results support chloroplast-localized translation specifically of mRNAs encoding  
196 proteins of the chloroplast.

## 197 **DISCUSSION**

198 Our results reveal localized translation of mRNAs encoding chloroplast proteins at a domain of  
199 the chloroplast envelope in *Chlamydomonas*. This translation domain contradicts the long-  
200 standing model that all chloroplast proteins are synthesized throughout the cytoplasm (4). In  
201 addition, the nascent polypeptide dependency of cyto-ribosome associations with the chloroplast  
202 supports co-translational import of chloroplast proteins (Fig. 3D). In this mechanism, the emerging  
203 nascent polypeptide passes through the chloroplast envelope via the TOC/TIC translocons during  
204 its synthesis, thereby tethering the cyto-ribosome to the chloroplast. Translation localization at the  
205 ER and mitochondria, in addition to tethering by nascent polypeptides, involves cyto-ribosome  
206 receptors on the organellar surface. These receptors were revealed by requirements for high ionic  
207 strength for ribosome dissociation from these organelles *in vitro* (23, 30–32). The possibility that  
208 cyto-ribosomes bind to receptors on the chloroplast surface is suggested by our finding that high  
209 ionic strength is required for their dissociation (Fig. 3D).

210 Our results reveal that chloroplast protein synthesis and import are organized spatially in a  
211 fashion analogous to mitochondrial protein synthesis in *Saccharomyces cerevisiae* and humans (33–  
212 37). Mito-ribosomes synthesize subunits of the complexes of the respiratory electron transport  
213 system and ATP synthase into the inner membrane where it invaginates to form cristae, i.e. cristae  
214 junctions (36–38). Cristae junctions are also preferential sites of the early steps of respiratory

215 complex assembly (36–38). As such, cristae junctions are analogous to the T-zone of the chloroplast  
216 (15). The translation domain of the chloroplast envelope is analogous to patches of mitochondrial  
217 outer membrane located outside cristae junctions, which are bound by translating cyto-ribosomes  
218 and enriched in the mitochondrial protein import translocons (21, 33, 36, 39). Therefore, spatial  
219 coordination of translation on and within each of the semiautonomous organelles might be a  
220 fundamental aspect of their biogenesis. This localized co-translational import of mitochondrial inner  
221 membrane proteins is hypothesized to facilitate their integration into the membrane and assembly  
222 with the locally synthesized protein products of mito-ribosomes (32, 40–42). Similarly, we  
223 hypothesize that LHCPs, and possibly other chloroplast proteins, are synthesized at the translation  
224 domain of the chloroplast envelope and undergo co-translational import into the T-zone to facilitate  
225 their insertion into developing thylakoid membranes and their assembly with subunits synthesized  
226 by chloro-ribosomes. In this model, the homologues of the chloroplast SRP system, cpSRP43 and  
227 cpSRP54, engage the nascent polypeptide as it emerges from the TIC translocon and direct it to the  
228 translocon for co-translational insertion into developing thylakoid membranes in the T-zone,  
229 thereby obviating the proposed post-translational roles of the chloroplast SRP system.

## References and Notes

- 230 1. S. Das, M. Vera, V. Gandin, R. H. Singer, E. Tutucci, Intracellular mRNA transport and  
231 localized translation. *Nat Rev Mol Cell Biol*, 1–22 (2021).
- 232 2. C. C. Williams, C. H. Jan, J. S. Weissman, Targeting and plasticity of mitochondrial  
233 proteins revealed by proximity-specific ribosome profiling. *Science*. **346**, 748–51 (2014).
- 234 3. M. G. Claros, J. Perea, Y. Shu, F. A. Samatey, J. L. Popot, C. Jacq, Limitations to in vivo  
235 import of hydrophobic proteins into yeast mitochondria. The case of a cytoplasmically  
236 synthesized apocytochrome b. *Eur J Biochem*. **228**, 762–71. (1995).
- 237 4. B. L. Weis, E. Schleiff, W. Zerges, Protein targeting to subcellular organelles via mRNA  
238 localization. *Biochim Biophys Acta*. **1833**, 260–73 (2013).

- 239 5. P. Jarvis, E. Lopez-Juez, Biogenesis and homeostasis of chloroplasts and other plastids. *Nat*  
240 *Rev Mol Cell Bio.* **14**, 787–802 (2013).
- 241 6. M. M. Margulies, A. Michaels, Ribosomes bound to chloroplast membranes in  
242 *Chlamydomonas reinhardtii*. *J Cell Biol.* **60**, 65-77. (1974).
- 243 7. D. A. Colon-Ramos, J. L. Salisbury, M. A. Sanders, S. M. Shenoy, R. H. Singer, M. A.  
244 Garcia-Blanco, Asymmetric distribution of nuclear pore complexes and the cytoplasmic  
245 localization of beta2-tubulin mRNA in *Chlamydomonas reinhardtii*. *Dev Cell.* **4**, 941–52  
246 (2003).
- 247 8. J. Uniacke, W. Zerges, Chloroplast protein targeting involves localized translation in  
248 *Chlamydomonas*. *Proc Natl Acad Sci U S A.* **106**, 1439–44 (2009).
- 249 9. C. M. Redman, D. D. Sabatini, Vectorial discharge of peptides released by puromycin from  
250 attached ribosomes. *Proc Natl Acad Sci U S A.* **56**, 608–615 (1966).
- 251 10. R. E. Kellems, V. F. Allison, R. A. Butow, Cytoplasmic Type 80 S Ribosomes Associated  
252 with Yeast Mitochondria II. EVIDENCE FOR THE ASSOCIATION OF CYTOPLASMIC  
253 RIBOSOMES WITH THE OUTER MITOCHONDRIAL MEMBRANE IN SITU. *J. Biol.*  
254 *Chem.* **249**, 3297–3303 (1974).
- 255 11. A. David, B. P. Dolan, H. D. Hickman, J. J. Knowlton, G. Clavarino, P. Pierre, J. R.  
256 Bennink, J. W. Yewdell, Nuclear translation visualized by ribosome-bound nascent chain  
257 puromycylation. *Journal of Cell Biology.* **197**, 45–57 (2012).
- 258 12. A. Bastide, J. W. Yewdell, A. David, The RiboPuromycylation Method (RPM): an  
259 Immunofluorescence Technique to Map Translation Sites at the Sub-cellular Level. *Bio*  
260 *Protoc.* **8**, e2669 (2018).
- 261 13. J. Uniacke, W. Zerges, Photosystem II assembly and repair are differentially localized in  
262 *Chlamydomonas*. *Plant Cell.* **19**, 3640–54 (2007).
- 263 14. M. Schottkowski, M. Peters, Y. Zhan, O. Rifai, Y. Zhang, W. Zerges, Biogenic membranes  
264 of the chloroplast in *Chlamydomonas reinhardtii*. *Proc Natl Acad Sci U S A.* **109**, 19286–91  
265 (2012).
- 266 15. Y. Sun, M. I. Valente-Paterno, S. Bakhtiari, C. Law, Y. Zhan, W. Zerges, Photosystem  
267 Biogenesis Is Localized to the Translation Zone in the Chloroplast of *Chlamydomonas*.  
268 *Plant Cell* (2019), doi:10.1105/tpc.19.00263.
- 269 16. T. Yamano, E. Sato, H. Iguchi, Y. Fukuda, H. Fukuzawa, Characterization of cooperative  
270 bicarbonate uptake into chloroplast stroma in the green alga *Chlamydomonas reinhardtii*.  
271 *Proc Natl Acad Sci U S A.* **112**, 7315–20 (2015).
- 272 17. J. P. Carde, J. Joyard, R. Douce, Electron Microscopic Studies of Envelope Membranes  
273 from Spinach Plastids. *Biology of the Cell.* **44**, 315-324. (1982).

- 274 18. G. Chepko, J. S. Weistrop, M. M. Margulies, The absence of cytoplasm ribosomes on the  
275 envelopes of chloroplasts and mitochondria in plants: Implications for the mechanism of  
276 transport of proteins into these organelles. *Protoplasma*. **100**, 385–392 (1979).
- 277 19. N. H. Chua, G. W. Schmidt, Transport of proteins into mitochondria and chloroplasts. *J*  
278 *Cell Biol.* **81**, 461–83 (1979).
- 279 20. S. U. Enam, B. Zinshteyn, D. H. Goldman, M. Cassani, N. M. Livingston, G. Seydoux, R.  
280 Green, Puromycin reactivity does not accurately localize translation at the subcellular level.  
281 *eLife*. **9**, e60303 (2020).
- 282 21. V. A. Gold, P. Chroscicki, P. Bragoszewski, A. Chacinska, Visualization of cytosolic  
283 ribosomes on the surface of mitochondria by electron cryo-tomography. *EMBO Rep.* **18**,  
284 1786–1800 (2017).
- 285 22. M. R. Adelman, D. D. Sabatini, G. Blobel, RIBOSOME-MEMBRANE INTERACTION :  
286 Nondestructive Disassembly of Rat Liver Rough Microsomes into Ribosomal and  
287 Membranous Components. *Journal of Cell Biology*. **56**, 206–229 (1973).
- 288 23. N. H. Chua, G. Blobel, P. Siekevitz, G. E. Palade, Attachment of chloroplast polysomes to  
289 thylakoid membranes in *Chlamydomonas reinhardtii*. *Proc Natl Acad Sci U S A.* **70**, 1554–8  
290 (1973).
- 291 24. N. Tsanov, A. Samacoits, R. Chouaib, A.-M. Traboulsi, T. Gostan, C. Weber, C. Zimmer,  
292 K. Zibara, T. Walter, M. Peter, E. Bertrand, F. Mueller, smiFISH and FISH-quant – a  
293 flexible single RNA detection approach with super-resolution capability. *Nucleic Acids*  
294 *Research*. **44**, e165–e165 (2016).
- 295 25. N. Nelson, A. Ben-Shem, The complex architecture of oxygenic photosynthesis. *Nat Rev*  
296 *Mol Cell Biol.* **5**, 971–82 (2004).
- 297 26. L. Dall’Osto, M. Bressan, R. Bassi, Biogenesis of light harvesting proteins. *Biochim*  
298 *Biophys Acta* (2015), doi:10.1016/j.bbabi.2015.02.009.
- 299 27. M. Ott, J. M. Herrmann, Co-translational membrane insertion of mitochondrially encoded  
300 proteins. *Biochimica et Biophysica Acta (BBA) - Molecular Cell Research*. **1803**, 767–775  
301 (2010).
- 302 28. E. J. Stauber, A. Fink, C. Markert, O. Kruse, U. Johannigmeier, M. Hippler, Proteomics of  
303 *Chlamydomonas reinhardtii* light-harvesting proteins. *Eukaryot Cell*. **2**, 978–94 (2003).
- 304 29. C. D. Silflow, J. L. Rosenbaum, Multiple  $\alpha$ - and  $\beta$ -tubulin genes in *chlamydomonas* and  
305 regulation of tubulin mRNA levels after deflagellation. *Cell*. **24**, 81–88 (1981).
- 306 30. M. Kiebler, R. Pfaller, T. Sollner, G. Griffiths, H. Horstmann, N. Pfanner, W. Neupert,  
307 Identification of a mitochondrial receptor complex required for recognition and membrane  
308 insertion of precursor proteins. *Nature*. **348**, 610–6 (1990).

- 309 31. Y. S. Bykov, D. Rapaport, J. M. Herrmann, M. Schuldiner, Cytosolic Events in the  
310 Biogenesis of Mitochondrial Proteins. *Trends in Biochemical Sciences*. **45**, 650–667 (2020).
- 311 32. C. Lesnik, A. Golani-Armon, Y. Arava, Localized translation near the mitochondrial outer  
312 membrane: An update. *RNA Biology*. **12**, 801–809 (2015).
- 313 33. S. Stoldt, D. Wenzel, K. Kehrein, D. Riedel, M. Ott, S. Jakobs, Spatial orchestration of  
314 mitochondrial translation and OXPHOS complex assembly. *Nat Cell Biol*. **20**, 528–534  
315 (2018).
- 316 34. S. Matsumoto, T. Uchiumi, T. Saito, M. Yagi, S. Takazaki, T. Kanki, D. Kang, Localization  
317 of mRNAs encoding human mitochondrial oxidative phosphorylation proteins.  
318 *Mitochondrion*. **12**, 391–398 (2012).
- 319 35. S. Gehrke, Z. Wu, M. Klinkenberg, Y. Sun, G. Auburger, S. Guo, B. Lu, PINK1 and Parkin  
320 Control Localized Translation of Respiratory Chain Component mRNAs on Mitochondria  
321 Outer Membrane. *Cell Metabolism*. **21**, 95–108 (2015).
- 322 36. F. Vogel, C. Bornhovd, W. Neupert, A. S. Reichert, Dynamic subcompartmentalization of  
323 the mitochondrial inner membrane. *J Cell Biol*. **175**, 237–47 (2006).
- 324 37. M. Zorkau, C. A. Albus, R. Berlinguer-Palmini, Z. M. A. Chrzanowska-Lightowlers, R. N.  
325 Lightowlers, High-resolution imaging reveals compartmentalization of mitochondrial  
326 protein synthesis in cultured human cells. *PNAS*. **118** (2021),  
327 doi:10.1073/pnas.2008778118.
- 328 38. K. Watson, THE ORGANIZATION OF RIBOSOMAL GRANULES WITHIN  
329 MITOCHONDRIAL STRUCTURES OF AEROBIC AND ANAEROBIC CELLS OF  
330 SACCHAROMYCES CEREVISIAE. *Journal of Cell Biology*. **55**, 721–726 (1972).
- 331 39. M. Garcia, X. Darzacq, T. Delaveau, L. Jourden, R. H. Singer, C. Jacq, Mitochondria-  
332 associated Yeast mRNAs and the Biogenesis of Molecular Complexes. *MBoC*. **18**, 362–368  
333 (2007).
- 334 40. A. Grevel, N. Pfanner, T. Becker, Coupling of import and assembly pathways in  
335 mitochondrial protein biogenesis. *Biological Chemistry*. **401**, 117–129 (2020).
- 336 41. T. D. Fox, Mitochondrial Protein Synthesis, Import, and Assembly. *Genetics*. **192**, 1203–  
337 1234 (2012).
- 338 42. L. E. Formosa, M. T. Ryan, Mitochondrial OXPHOS complex assembly lines. *Nat Cell*  
339 *Biol*. **20**, 511–513 (2018).

341 **Acknowledgments:** For technical assistance, infrastructure and support we thank the Centres for  
342 Microscopy & Cell Imaging and Structural & Functional Genomics (Concordia University) and  
343 Jeannie Mui and the Facility for Electron Microscopy Research (McGill University). For  
344 generous gifts of antibodies, we thank Prof. Hideya Fukuzawa (LCIA, Kyoto University), Dr.  
345 Elizabeth Harris ( $\alpha$ AtpB and  $\alpha$ cyL4, Duke University), Drs Pierre Crozet and Stephane Lemaire  
346 ( $\alpha$ PRK) and Dr. Jonathan Yewdell for depositing PMY-2A4 at Developmental Studies  
347 Hybridoma Bank).

348 **Funding:** This work was supported by NSERC Discovery Grant 217566 (WZ).

349 **Author contributions:**

350 Conceptualization: YS, SB, WZ

351 Methodology: YS, SB, CL, YW, MVP, KHB

352 Investigation: YS, SB, YW, DD, MVP, JD.

353 Visualization: SB, YS, CL, DD, KHB.

354 Funding acquisition: WZ

355 Project administration: WZ

356 Supervision: YS, KHB, WZ

357 Writing – original draft: WZ

358 Writing – review & editing: YS, SB, WZ, KHB.

359 **Competing interests:** Authors declare that they have no competing interests.

360 **Data and materials availability:** All data, code, and materials used in the analysis must be  
361 available in some form to any researcher for purposes of reproducing or extending the

362 analysis. Include a note explaining any restrictions on materials, such as materials transfer  
363 agreements (MTAs). Note accession numbers to any data relating to the paper and deposited  
364 in a public database; include a brief description of the data set or model with the number. If  
365 all data are in the paper and supplementary materials, include the sentence “All data are  
366 available in the main text or the supplementary materials.”

## 367 **Supplementary Materials**

368 Materials and Methods

369 Figs. S1 to S4

370 Table S1

371



372

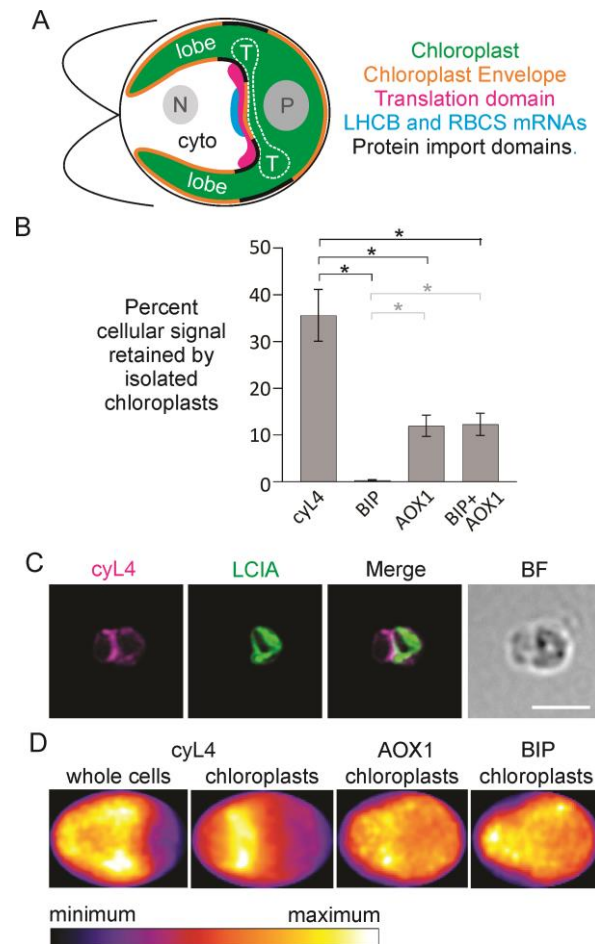

373 **Fig. 1. Cyto-ribosomes are bound to a domain of the chloroplast envelope.** (A) An illustration  
 374 shows a *Chlamydomonas* cell with the nucleus (grey sphere), cytosol (cyto) and chloroplast  
 375 (green). The chloroplast has lobes which enclose the nucleus (grey sphere), and cytosol (cyto),  
 376 pyrenoid (black sphere), the T-zone (T) and it is surrounded by a dual membrane envelope  
 377 (orange). The translation domain of the envelope (magenta) is adjacent to the mRNA-enriched  
 378 region (cyan) and overlaps envelope domains shown previously to be enriched in the TOC/TIC  
 379 protein import translocons (black) (14). (B) Results of immunoblot analyses of marker proteins in  
 380 extracts of whole cells versus isolated chloroplasts reveal that cyto-ribosomes (cyL4) preferentially  
 381 copurify with chloroplasts (AtpB) relative to the organelles known to be bound by cyto-ribosomes;  
 382 ER (BIP), mitochondria (AOX1). (Immunoblot results are in Fig. S4. Error bars= 1.0 SEM, n=3  
 383 biological replicates from independent cultures). (C) IF-microscopy images of purified  
 384 chloroplasts show cyL4 localized to a domain of the envelope (LCIA). The absence of LCIA signal  
 385 from the lobes of the chloroplast does not reflect a change in chloroplast morphology during  
 386 isolation (Fig. S3). (BF, bright field, size bar, 5.0  $\mu$ m) (D) Heat maps show average IF signals of  
 387 cyL4, AOX1, and BIP from all cells or chloroplasts in representative data sets (CyL4, n= 32  
 388 chloroplasts or n= 102 cells; AOX1, n=22 chloroplasts; BIP48, n=48 chloroplasts).

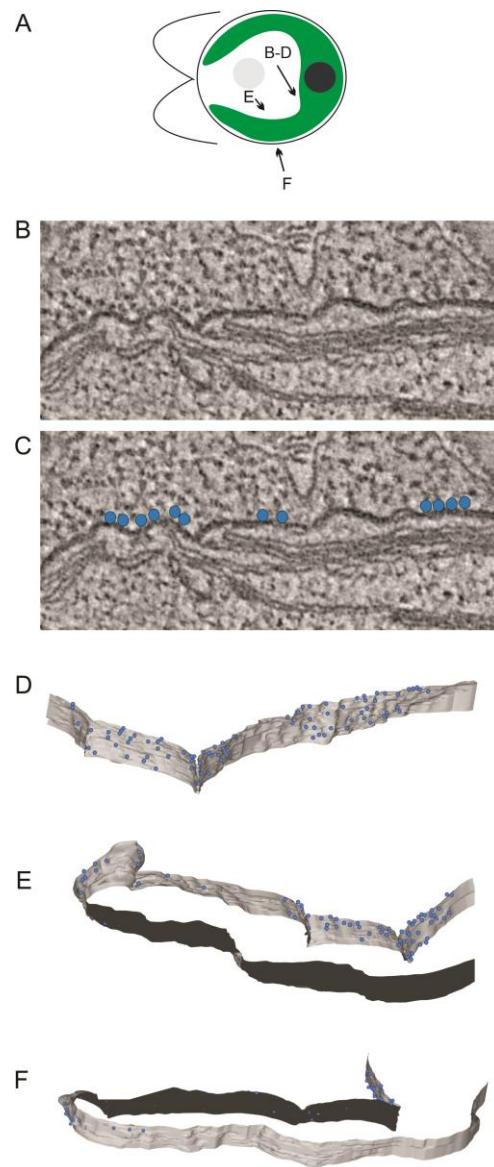

389 **Fig. 2. Electron tomograms show cyto-ribosomes on the outer membrane of the chloroplast**  
390 **envelope.** (A) The illustration shows the regions where the tomographs were acquired for B-E. (B)  
391 A tomographic slice showing the region of chloroplast envelope bound by cyto-ribosomes as seen  
392 by IF microscopy (Fig. 1C). (C) The image in B with blue dots marking the cyto-ribosomes that  
393 are on the envelope. (D-E) Models of chloroplast envelope (grey, cytoplasmic face of the outer  
394 membrane; black, stromal face of the inner membrane) and bound cyto-ribosomes (blue dots) as  
395 seen from the angles shown in Panel B.

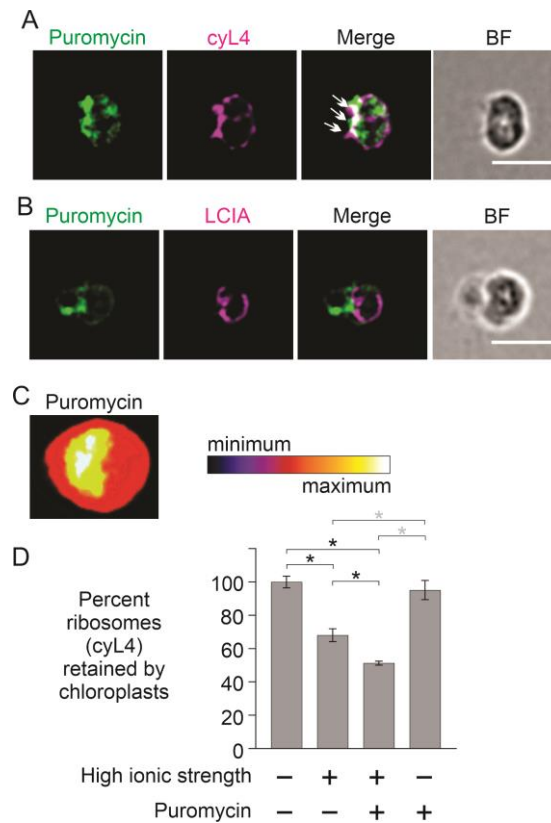

396 **Fig. 3. The cyto-ribosomes on the chloroplast are translationally active and tethered by**  
397 **nascent polypeptides.** (A and B) Results of the RPM method show IF signal of the puromycin-  
398 conjugated nascent polypeptides (green), as markers of translation, localized to (A) the cyto-  
399 ribosome (cyL4) IF signal (B) on the cytoplasmic side of the chloroplast envelope (LCIA) (size  
400 bar, 5.0  $\mu\text{m}$ ). Arrows indicate sites of colocalization of puromycin-conjugated nascent  
401 polypeptides and cyto-ribosomes. The green IF signal is specific to puromycin (Fig S2C). (C) A  
402 heat map of the average IF signal from the puromycin-conjugated nascent polypeptides from all  
403 chloroplasts in this data set (n= 30) shows that the individual chloroplasts are representative. (D)  
404 Bar heights indicate the average proportion of cyto-ribosomes (cyL4) retained by isolated  
405 chloroplasts following the treatments indicated. (Immunoblot results represented by this graph are  
406 presented in Fig S4.) High ionic strength was 750 mM KCl. (Error bars= 1.0 SEM, n= 3 biological  
407 replicates from independent cultures).

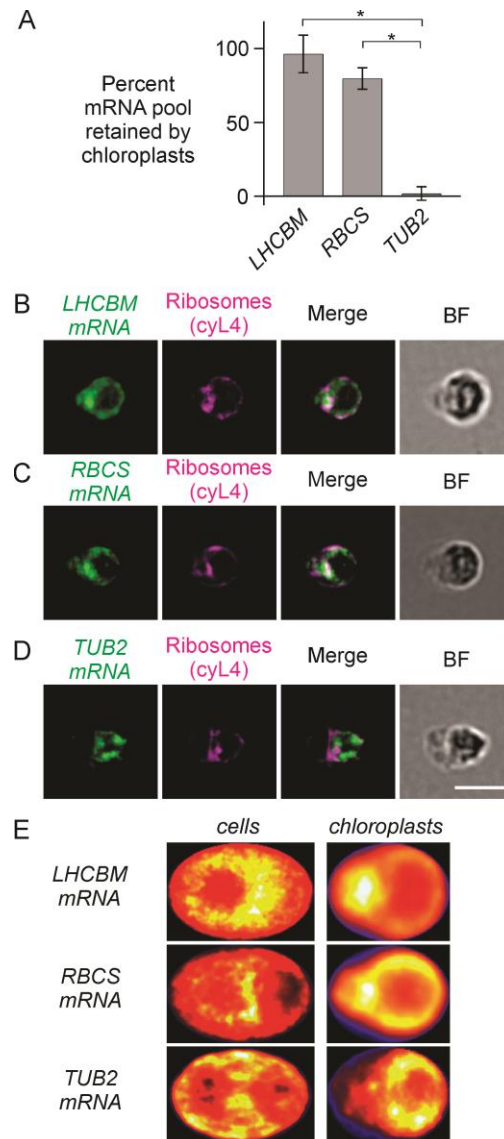

408 **Fig. 4. FISH results reveal that mRNAs encoding specifically chloroplast-localized proteins**  
409 **are bound to isolated chloroplasts.** (A) Bar heights represent percentages of the average FISH  
410 signal intensities of whole cells that were retained by chloroplasts for the mRNAs indicated. (Error  
411 bars= 1.0 SEM). (B-D) Chloroplasts IF-stained for cyto-ribosomes (cyL4) and FISH-probed for  
412 the mRNAs encoding chloroplast-localized proteins of (B) the *LHCBM* mRNAs or (C) the *RBCS*  
413 mRNAs. (D) Chloroplast FISH-probed for the *TUB2* mRNA as a control mRNA encoding a non-  
414 chloroplast protein. Size bar, 5.0  $\mu$ m. (E) Heat maps show the distributions of the average FISH  
415 signals in maximal intensity projections of image stacks from all cells or chloroplasts in each data  
416 set ( $n \geq 30$  cells or chloroplasts per data set).
