# Supplementary material for: Chloroplast-localized translation for protein targeting in Chlamydomonas reinhardtii
Source: bioRxiv or medRxiv preprint supplement (doi:10.1101/2021.12.27.474283), 2021-12-28
Supplement: Supplementary file [file media-1.pdf]

# Supplementary Materials

## This PDF file includes:

Materials and Methods  
Figs. S1 to S4  
Table S1  
References (40–48)

## Materials and Methods

**Strains.** *Chlamydomonas reinhardtii* strain used for most experiments has a cell-wall deficiency (CW15) (CC-400 *MT+*). For the results in Figure 2, wild-type strain CC-125 was used. Strains were cultured to  $1 \times 10^5$  cells·ml<sup>-1</sup> in high salt minimal (HSM) medium (43), with aeration, illuminated by banks of red and blue LEDs at  $150 \mu\text{E} \cdot \text{m}^{-2} \cdot \text{s}^{-1}$  at 23 °C with orbital shaking (120 rpm). CC-400 was cultured in HSM containing 1.0% (w/v) sorbitol. Cultures were entrained under alternating cycles of 12 h light:12 h dark for 3 days to a density of  $\sim 4 \times 10^6$  cells·ml<sup>-1</sup>. Cells were harvested at the fourth hour of final light cycle by centrifugation (3,000 g, 5 min at RT). **Chloroplast isolation** was performed as described previously with the following modifications (44, 45). Cell pellets were resuspended to  $1 \times 10^8$  cells·ml<sup>-1</sup> in isolation buffer (IB) [300 mM Sorbitol, 50 mM HEPES-KOH pH 7.5, 25 mM MgCl<sub>2</sub>, 0.1% (w/v) BSA]. Saponin (Sigma, # 47036) 10% (w/v) freshly dissolved in IB) was added to 0.4% (w/v), followed by incubation at 22 °C for 10 min with occasional gentle agitation. The resuspension was passed twice through a 27-gauge needle at  $0.1 \text{ mL} \cdot \text{s}^{-1}$ . Cells and chloroplasts were collected by centrifugation at 750 g for 2 min at 4 °C. The pellet was resuspended in IB and overlaid on the Percoll gradient (45), which was centrifuged for 25 min at 3,200 g. The material at the 45-65% interface was collected. The Percoll was diluted by addition of 4 vol IB. Chloroplasts were pelleted by centrifugation (670 g, 1 min, 4 °C), resuspended in buffer according to the downstream use.

**Immunoblot Analysis.** For the immunoblots in Fig 1E, same number of isolated chloroplasts were resuspended in SDS-PAGE loading buffer and resolved by SDS-PAGE (12% acrylamide) (46). Proteins were transferred to a membrane of PVDF (BIO-RAD) or, for AOX1 detection, nitrocellulose (BIO-RAD) and reacted with primary and secondary antibodies as described previously (46). The primary antibodies were:  $\alpha$ -BIP (Santa Cruz sc-33757) (1:150),  $\alpha$ -AOX1 (Agrisera AS06 152, 1:150,000),  $\alpha$ -cyL4 (1:6,000)(47) and  $\alpha$ -AtpB (1:6,000). The secondary antibody was horseradish peroxidase-conjugated goat anti-rabbit IgG antibody (KPL). Signals were detected using an ECL substrate (Thermo-Fisher) with an Imager 600 (Amersham/GE) according to the manufacturer's protocols. Signal quantification was conducted with Imager 600 Analysis Software (Amersham).

**IF-staining.** FISH and microscopy IF-staining was performed as described previously (48). The primary antibodies and the dilutions were:  $\alpha$ cyL4 (1:1000) (47),  $\alpha$ AOX1 (1:1,200), and  $\alpha$ BIP (1:100). The secondary antibody was AlexaFluor568 conjugated to goat anti-rabbit IgG (Thermo Fisher). For dual IF-staining (Figure 1C), chloroplasts were first reacted with  $\alpha$ -LCIA (1:700) and then indirectly IF-labelled by AffiniPure Fab Fragment Donkey Anti-Rabbit IgG (H+L) conjugated to AlexaFluor488 (Jackson ImmunoResearch Inc). Chloroplasts were reacted with  $\alpha$ cyL4 (1:1000) and then indirectly IF-labelled by goat anti-rabbit IgG conjugated to AlexaFluor568 (Thermo Fisher). For consistency, the cyL4 IF signal is presented in magenta and

42 other signals in green. Microscopy was carried out with a Leica DMI6000B inverted  
43 epifluorescence microscope with a 63x Plan Apo objective (NA 1.4) and further magnified by a  
44 1.6x tube lens. Images were acquired on a Hamamatsu Orca R2 C10600-10B camera controlled  
45 by Volocity software (Improvision). Filters: Texas Red (562/40nm ex: 624/40nm em) for  
46 AlexaFluor568 and GFP (472/30nm ex: 520/35nm em) for AlexaFluor488. Acquired images were  
47 taken using Z plane stacks with a spacing of 0.2  $\mu\text{m}$  per section; exposure settings, gain, and  
48 excitation intensity were kept constant where comparisons between intensities was required. For  
49 deconvolution, Z-stacks were taken by series capture at a thickness of 0.2  $\mu\text{m}$  per section and were  
50 deconvoluted with AutoQuant X3 (Media Cybernetics Inc). FISH was carried out as described  
51 previously, except that of BSA concentration in hybridizations was 4.5 mg/ml (24). For the results  
52 in Figure 4A, the average FISH signal intensity from the probe with random sequence obtained for  
53 cells or chloroplasts in each trial was subtracted from the average intensities of the mRNA FISH  
54 probes. p-values are from 2-tailed Student's t-tests comparing,  $n \geq 3$  biological replicates using  
55 independent cultures. The images in Figure 4B-D were adjusted to best show distributions of each  
56 mRNA signal using Photoshop (Adobe). The TUB2 mRNA FISH signal was seen previously  
57 throughout the cytoplasm in deflagellated cells, as we observed here, possibly because the strain  
58 that we used lacks flagella (7) (Supplemental Figure 1D, Figure 4D). Specificities of the FISH  
59 signals of the RBCS1/RBCS2 and LHCBM2/7 mRNAs were demonstrated previously (8). To  
60 determine the average distribution of fluorescent signals in cells or chloroplasts of a data set, we  
61 used a macro which operates within ImageJ, described previously (15, 49)  
62 (<https://github.com/Zergeslab/cellHarvester>).

63 High resolution electron tomography. Sections of 300 nm thickness from the resin-embedded cells  
64 above were collected on Formvar support slot grids and stained. The dual-axis tilt series were  
65 collected using the FEI Tecnai G<sup>2</sup> F20 200 kV TEM equipped with a Gatan Ultrascan 4000 4k x  
66 4k CCD Camera System Model 895 and a single tilt holder. Tilt series were then acquired at 2°  
67 increment from -60° to 60°, at 19000x magnification, 5.91 Å pixel size using SerialEM (50). For  
68 the second axis tilt series acquisition, the slot grid was rotated 90° manually and the same area of  
69 interest was searched manually. The dual-axis tomograms were reconstructed from the tilt series  
70 using IMOD software package (51). The modelling and visualization of the membrane and cyto-  
71 ribosomes were done also by IMOD.

72 RPM and puromycin-release assays. For the RPM method, isolated chloroplasts ( $1 \times 10^8 \text{ ml}^{-1}$  in IB  
73 were treated with 1.0 mM puromycin (Bioshop) for 10 min at RT and then IF-stained with a mouse  
74 monoclonal antibody against puromycin (DSHB Hybridoma Product PMY-2A4, deposited by J.  
75 Yewdell). The IF signal was specific (Fig. S2C). The puromycin-release assay followed protocols  
76 that were used to show ribosome association to ER, mitochondria and thylakoid membranes with  
77 following modifications (10, 22, 23). Cells of CC-400 ( $9 \times 10^8$ ) were pelleted by centrifugation at  
78 3,000 x g, 5 min at RT. Cell density was adjusted with HSM+1% sorbitol to  $1.2 \times 10^7$ . Chloroplasts  
79 were resuspended with 1.0 mL IB (150  $\mu\text{L}$ ), pelleted at 1,000 x g for 3 min at RT, resuspended  
80 with 1.0 mL of one of the following four conditions: 1) IB+ 5 mM DTT, 2) IB+ 5 mM DTT+ 750  
81 mM KCl, 3) IB+ 5 mM DTT+ 1 mM puromycin + 750 mM KCl and 4) IB+ 5 mM DTT+ 1 mM  
82 puromycin. Samples were incubated at RT for 20 min. Chloroplast were pelleted by centrifugation  
83 (1,000 x g for 3 min at RT) for immune-blot analyses. Results are from three concurrent biological  
84 replicate experiments (i.e. from independent cultures, Fig. S4).

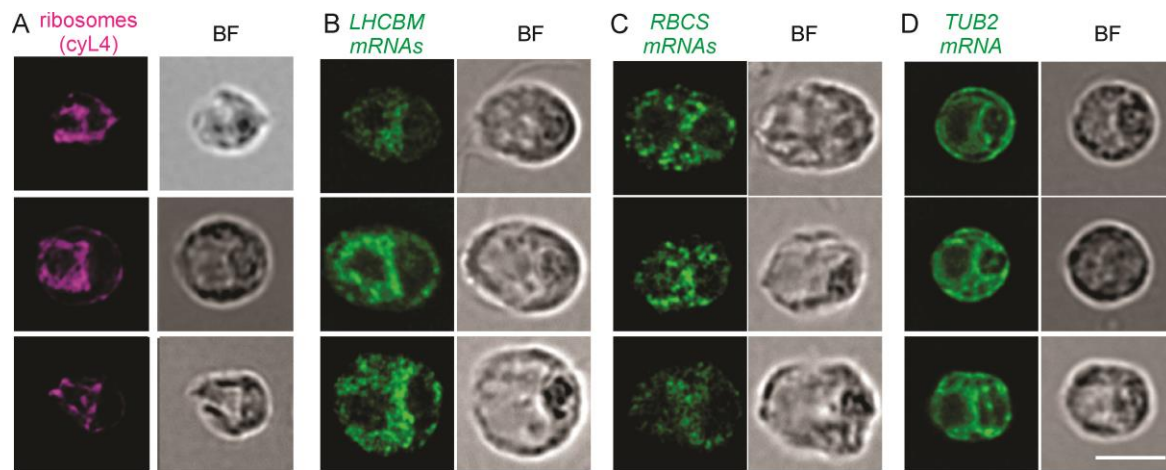

**Fig. S1.**

85 Localization patterns reported previously. Epifluorescence microscopy images of cells that were  
 86 (A) IF-stained for cyL4 or (B-D) FISH-probed for (B) the LHCBM mRNAs, (C) the RBCS  
 87 mRNAs or the (D) TUB2 mRNA. These cells show patterns that were reported previously (7, 8);  
 88 cyL4, LHCBM mRNAs and RBCS mRNAs, and TUB2 mRNA. Error bar = 5.0  $\mu\text{m}$ . Create a  
 89 page break and paste in the Figure above the caption.

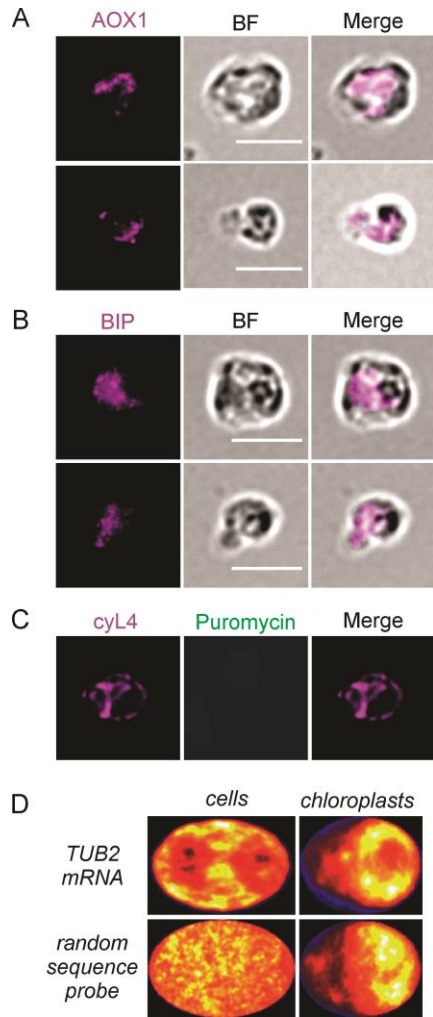

91 **Fig. S2.**  
 92 Experimental controls. Isolated chloroplasts that were IF-stained for marker proteins for (A)  
 93 mitochondria (AOX1) or (B) endoplasmic reticulum (BIP) do not show the localization pattern  
 94 seen for (C) the ribosome marker protein (cyL4). (C) With the RPM method (Figure 3), the  
 95 puromycin IF signal seen at the localized IF signal from cytoplasmic ribosomes (cyL4) on  
 96 isolated chloroplasts is specific; it was not detected from chloroplasts that were not treated with  
 97 puromycin. (D) The average distributions of the TUB2 mRNA FISH signal from all imaged cells  
 98 and chloroplasts is compared to average distributions of the background signal from a control  
 99 FISH probe with a random sequence that is not in the *Chlamydomonas* genome. The  
 100 distributions of the average TUB2 mRNA and control FISH signals differ in cells, supporting the  
 101 former as representing this mRNA. From chloroplasts, the signals are both weak and their  
 102 distributions are similar, suggesting that much or all TUB2 mRNA FISH signal from  
 103 chloroplasts is background

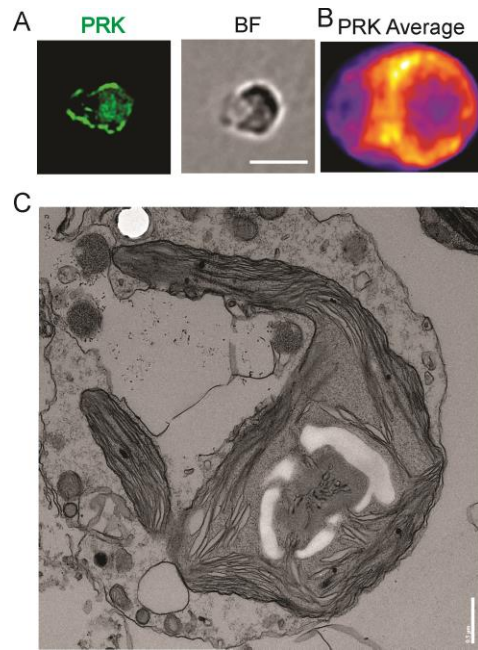

**Fig S3**

The isolated chloroplasts retain normal morphology (see Figure 1A for reference). (A) An isolated chloroplast IF stained for phosphoribulose kinase (PRK) to reveal the entire chloroplast and its retention of normal morphology during isolation. (B) A heatmap of the average PRK signal across all chloroplasts of the data set shows entire chloroplast and contrasts the heatmaps of the IF-signals of cyL4 (Figure 1D), puromycin (Figure 3C), and the FISH signals from the LHCB and RBCS mRNAs (Figure 4E) (n=30). (C) Transmission EM image of an isolated chloroplast shows that it has normal morphology. Cells were collected from cultures entrained to the diurnal cycle and processed as described previously (15). Images were acquired on a FEI Tecnai 12 120kv Transmission electron microscope using the Tecnai User Interface software and an AMTv601 CCD Camera. Settings used were an aperture of 3, a spot size of 2, and variable magnifications ranging from 2,900X to 68,000X.

104  
105  
106  
107  
108  
109  
110  
111  
112  
113  
114  
115

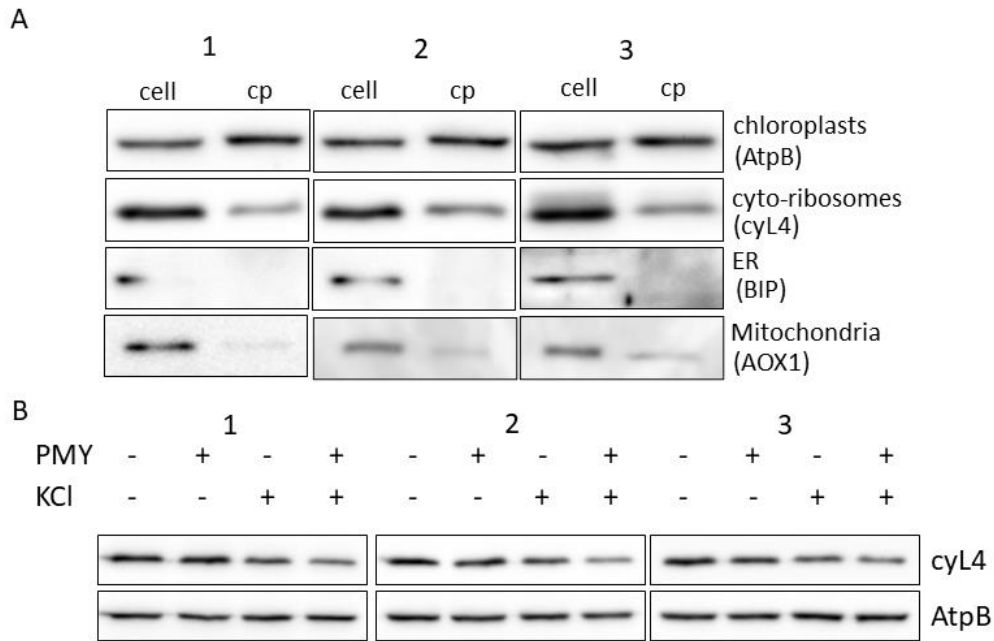

116  
117  
118  
119  
120  
121  
122  
123

**Fig. S4.**

(A) These immunoblot results are represented by the bar heights in Figure 1B. Trials 1-3 are three biological replicate experiments, each performed from an independent culture. (B) These immunoblot results are represented by the bar heights in Figure 3C. Note the different order of treatments here and in the bar graph in Fig. 3D. Trials 1-3 are three biological replicate experiments, each performed from an independent culture and all conducted in parallel, including the immunoblots transfer, immune-reaction steps, and ECL imaging. KCl, incubation in 750 mM KCl; puromycin, PMY. The chloroplast protein AtpB was used as a loading control.

**Table S1. FISH probe sequences.**

|                                         |                                                                                                      | Probe Name | Probe Sequence (5' to 3')                                                                                                                                                           |
|-----------------------------------------|------------------------------------------------------------------------------------------------------|------------|-------------------------------------------------------------------------------------------------------------------------------------------------------------------------------------|
| oligo for labeling mRNA-specific probes |                                                                                                      | FLAP X-Cy3 | Cy3/C ACT GAG TCC AGC TCG AAA CTT AGG AGG/Cy3<br><br>mRNA-specific probes below have a 3' extension with the FLAPX reverse complement sequence:<br>CCTCCTAAGTTTCGAGCTGGACTCA<br>GTG |
| LHCBM                                   | LHCBM7<br>Cre12.g548950<br><br>* $\geq$ 95% sequence identity to the mRNA of LHCBM2<br>Cre12.g548400 |            |                                                                                                                                                                                     |
|                                         |                                                                                                      | LHCII- 1   | GAGGACTTCATGATGGCGGCCATTTTGATTG-<br>FLAPX reverse complement (above).                                                                                                               |
|                                         |                                                                                                      | LHCII- 2*  | AAGAAGCCGAACATGGAGAACATAGCCAGG<br>C-FLAPX reverse complement (above).                                                                                                               |
|                                         |                                                                                                      | LHCII- 3   | GTACATGCAGCTGCCGAGGGCCAAAAATTTA<br>-FLAPX reverse complement (above).                                                                                                               |
|                                         |                                                                                                      | LHCII- 4   | GCTCCTAAGCCTGTGAAAAGAGGCTCACACT-<br>FLAPX reverse complement (above).                                                                                                               |
|                                         |                                                                                                      | LHCII- 5*  | GTCGCCCTCCGAGAAGGGGGCCAGGAACTTC<br>-FLAPX reverse complement (above).                                                                                                               |
|                                         |                                                                                                      | LHCII- 6*  | GACAGACCGGCGGTGTCCCAGCCGTAGTCGC<br>-FLAPX reverse complement (above).                                                                                                               |
|                                         |                                                                                                      | LHCII- 7   | GATCAGCTCCAGCTCGCGGTAGCGCTTGAAG-<br>FLAPX reverse complement (above).                                                                                                               |
|                                         |                                                                                                      | LHCII- 8*  | CCTTGAACCAGACAGCCTCACCGAACGGGAT<br>-FLAPX reverse complement (above).                                                                                                               |
|                                         |                                                                                                      | LHCII- 9*  | AGGTAGTTCAGGCCGCCCTCAGCGAAGATCT-<br>FLAPX reverse complement (above).                                                                                                               |
|                                         |                                                                                                      | LHCII-10*  | ATGATGGACTGGGCGTGGATCAGGTTCTCGT-<br>FLAPX reverse complement (above).                                                                                                               |
|                                         |                                                                                                      | LHCII-11*  | TCAGCCAGGCCCATCACCACAACCTGGAAGG<br>-FLAPX reverse complement (above).                                                                                                               |
|                                         |                                                                                                      | LHCII-12*  | ATCTCCTTCACCTTCAGCTCAGCGAAGGTGT-<br>FLAPX reverse complement (above).                                                                                                               |
|                                         |                                                                                                      | LHCII-13   | CGTAGCACCGCCACTTCGGTTAATCGCACGT-<br>FLAPX reverse complement (above).                                                                                                               |
|                                         |                                                                                                      | LHCII-14   | CAAAACCCGAACACAAAACCTGAACCTCCGTA<br>-FLAPX reverse complement (above).                                                                                                              |
|                                         |                                                                                                      | LHCII-15   | GTGAACTTGGTGGCGTAGGCGAACGCGTTCA<br>-FLAPX reverse complement (above).                                                                                                               |
|                                         |                                                                                                      | LHCII-16*  | TTGGCCAGGTGGTCTCGTCCAGGTTCTGGATGG-<br>FLAPX reverse complement (above).                                                                                                             |
|                                         |                                                                                                      | LHCII-17*  | ATGCAGCCCAGAGCGCCAGCATGGCCAGC<br>-FLAPX reverse complement (above).                                                                                                                 |
|                                         |                                                                                                      | LHCII-18   | ACCGGCTGCTCACGGTGGAGCGCACGGAGCT<br>-FLAPX reverse complement (above).                                                                                                               |

|      |                                                                                                                                |           |                                                                        |
|------|--------------------------------------------------------------------------------------------------------------------------------|-----------|------------------------------------------------------------------------|
|      |                                                                                                                                | LHCII-19  | CACCGCGCTCCTCTTCATCTCCGCTCAATCA-<br>FLAPX reverse complement (above).  |
|      |                                                                                                                                | LHCII-20  | GTGGCCGTCAAGCCATTTTGTAGTCTTCTCAA-<br>FLAPX reverse complement (above). |
|      |                                                                                                                                | LHCII-21  | TGCCGTGTTACACAACAAGGGCAAATCGCAA-<br>FLAPX reverse complement (above).  |
|      |                                                                                                                                | LHCII-22  | TAGACAGCTAGAACAAGCAGGCTGTAAAG<br>A-FLAPX reverse complement (above).   |
|      |                                                                                                                                | LHCII-23  | TCAGCCAGGCCAGGGGTCAAAGGCACCAC<br>-FLAPX reverse complement (above).    |
|      |                                                                                                                                | LHCII-24* | CCACTCGATGGCAGCGGGGCACCACGCGA<br>-FLAPX reverse complement (above).    |
|      |                                                                                                                                |           |                                                                        |
| RBCS | RBCS2<br>Cre02.g120150<br>* $\geq$ 95% sequence<br>identity to the mRNA<br>of RBCS1 ( $\geq$ 95%<br>identity)<br>Cre02.g120100 |           |                                                                        |
|      |                                                                                                                                | RbcS- 1   | ACCCATCAAACATCATCTGGTTTGGCTGC-<br>FLAPX reverse complement (above).    |
|      |                                                                                                                                | RbcS- 2   | GGCGCCATTTTAAGATGTTGAGTACTTCT-<br>FLAPX reverse complement (above).    |
|      |                                                                                                                                | RbcS- 3*  | GTCCAGACCATCATCTGGTTGGCCTGAGCCG-<br>FLAPX reverse complement (above).  |
|      |                                                                                                                                | RbcS- 4*  | GGTCCAGTAGCGGTTGTCGTAGTACAGCTGC-<br>FLAPX reverse complement (above).  |
|      |                                                                                                                                | RbcS- 5*  | ATGATCTGCACCTGCTTCTGGTTGTGCAAGG-<br>FLAPX reverse complement (above).  |
|      |                                                                                                                                | RbcS- 6*  | TTGGTGCAGGCGACGATCTCGCGCAGCACCT-<br>FLAPX reverse complement (above).  |
|      |                                                                                                                                | RbcS- 7   | ACACGTAGGCCTTGTCCGACTCAGCGAACTC-<br>FLAPX reverse complement (above).  |
|      |                                                                                                                                | RbcS- 8   | AATGTAGTCGACCTGGGCGGCGATCTGCTCG-<br>FLAPX reverse complement (above).  |
|      |                                                                                                                                | RbcS- 9*  | GCCACGGCCGCGGAGACGGAGGACTTGGCA<br>A-FLAPX reverse complement (above).  |
|      |                                                                                                                                | RbcS-10   | TTACACGGAGCGCTTGTGGCGGGCTGCCAG-<br>FLAPX reverse complement (above).   |
|      |                                                                                                                                | RbcS-11*  | TCGCGGCAGCCGAACATGGGCAGCTTCCACA<br>-FLAPX reverse complement (above).  |
|      |                                                                                                                                | RbcS-12*  | CAAGACACGCTGCCGAAGCGGATGGCCGACT<br>-FLAPX reverse complement (above).  |
|      |                                                                                                                                | RbcS-13*  | GCCTTGACGGCGGGCTTCAGCGCGCCATGG<br>-FLAPX reverse complement (above).   |
|      |                                                                                                                                | RbcS-14   | TAGGAGAAGGTCTCGAACATCTTGTGTTGA-<br>FLAPX reverse complement (above).   |
|      |                                                                                                                                | RbcS-15   | AGCAGTATCTTCCATCCACCGCCGTTCTCA-<br>FLAPX reverse complement (above).   |
|      |                                                                                                                                | RbcS-16   | GCACGAAACGGGGAGCTAAGCTACCGCTTCA<br>-FLAPX reverse complement (above).  |
|      |                                                                                                                                | RbcS-17   | TGCAAACTCCTCCGCTTTTACGTGTTGAA-<br>FLAPX reverse complement (above).    |
|      |                                                                                                                                | RbcS-18   | GGGGCAAGGCTCAGATCAACGAGCGCCTCCA<br>-FLAPX reverse complement (above).  |



|                              |               |           |                                                                       |
|------------------------------|---------------|-----------|-----------------------------------------------------------------------|
| TUB2                         | Cre12.g549550 |           |                                                                       |
|                              |               | Tubulin-1 | CGATCACAAGCTCGAGTGGCCTGTGTAGAAG<br>-FLAPX reverse complement (above). |
|                              |               | Tubulin-2 | AAACCATGACGGCAAAAACATTATCAAGCAT<br>-FLAPX reverse complement (above). |
|                              |               | Tubulin-3 | TACGAAGAGTTCTTGTCTGCACGTTTCAGCA-<br>FLAPX reverse complement (above). |
|                              |               | Tubulin-4 | GCCTCCACACCAAAGCGTCAAATGGCAATCA<br>-FLAPX reverse complement (above). |
|                              |               | Tubulin-5 | CAGCTGCTATGGCCTATCACACAAGAGCTAA-<br>FLAPX reverse complement (above). |
| Non-<br>specific<br>sequence |               | Scramble  | CTGAGTTAAGGCTTCCACGGACGAGTTAAT-<br>FLAPX reverse complement (above).  |
